# Supplementary material for: A Zn based metal organic framework nanocomposite: synthesis, characterization and application for preconcentration of cadmium prior to its determination by FAAS
Source: Royal Society of Chemistry journal article supplement (doi:10.1039/c7ra08354h), 2017-01-01
Supplement: c7ra08354h1.pdf [file c7ra08354h1.pdf]

Article title: Zn based metal organic framework nanocomposite: Synthesis, characterization and application for preconcentration of cadmium prior to its determination by FAAS

Journal name: RSC Advances

Author names: Zahra Nazari, Mohammad Ali Taher, Hamid Fazelirad

Affiliation of the corresponding author (Hamid Fazelirad): Young Researchers and Elite Club, Yazd Branch, Islamic Azad University, Yazd, Iran

E-mail address of the corresponding author (Hamid Fazelirad): [hamidfazelirad@gmail.com](mailto:hamidfazelirad@gmail.com)

**Fig. S1:** SEM images of Zn-MOF nanoparticles in different synthesis conditions: a) 150 °C for 6 h, b) 150 °C for 8 h, c) 150 °C for 10 h, d) 200 °C for 4 h and e) 200 °C for 6 h.

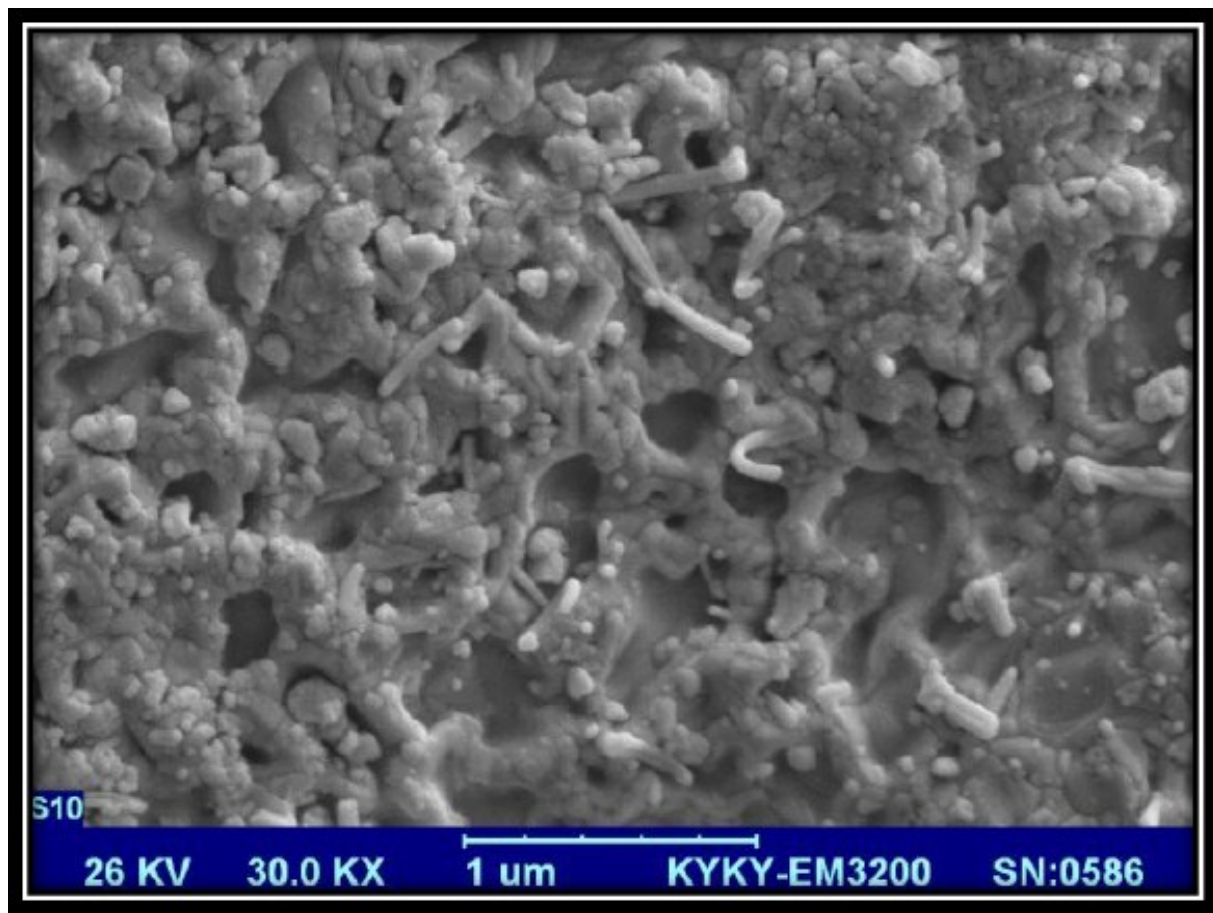

Fig. S1a

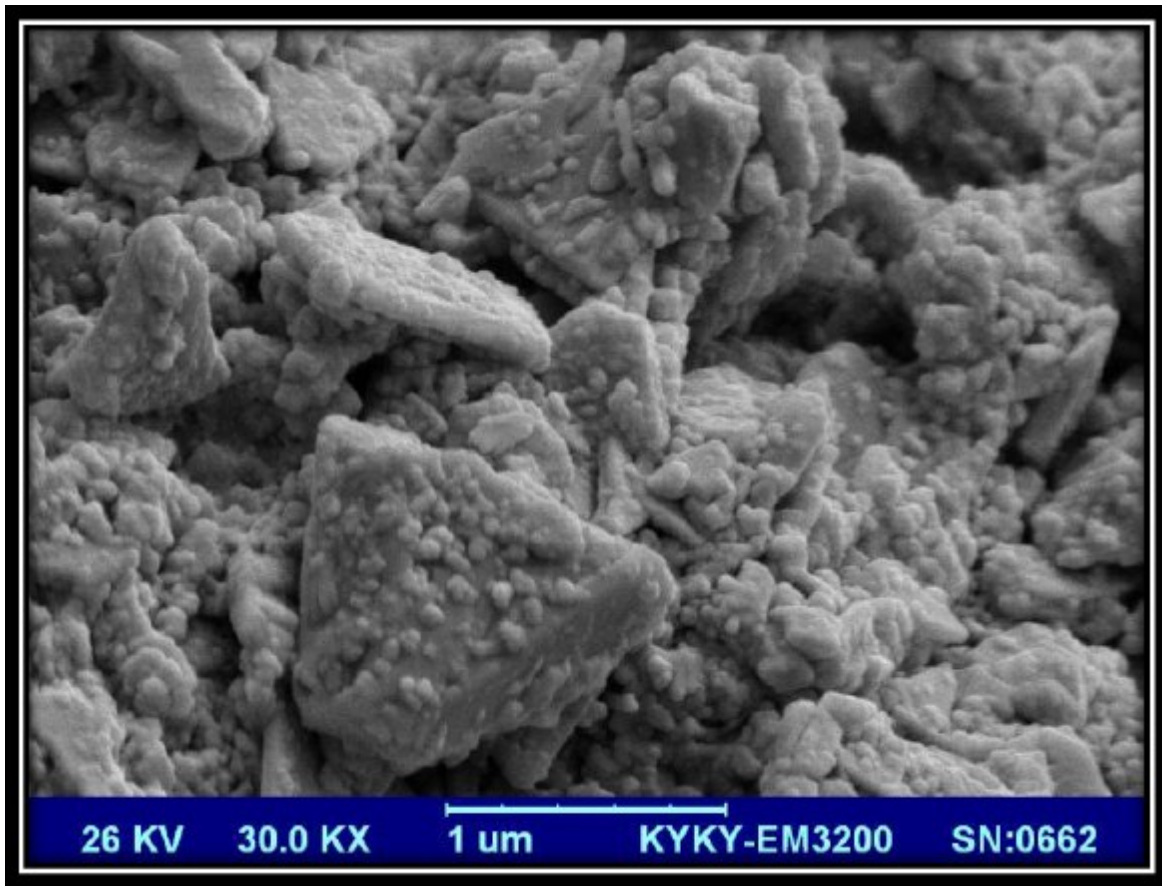

Fig. S1b

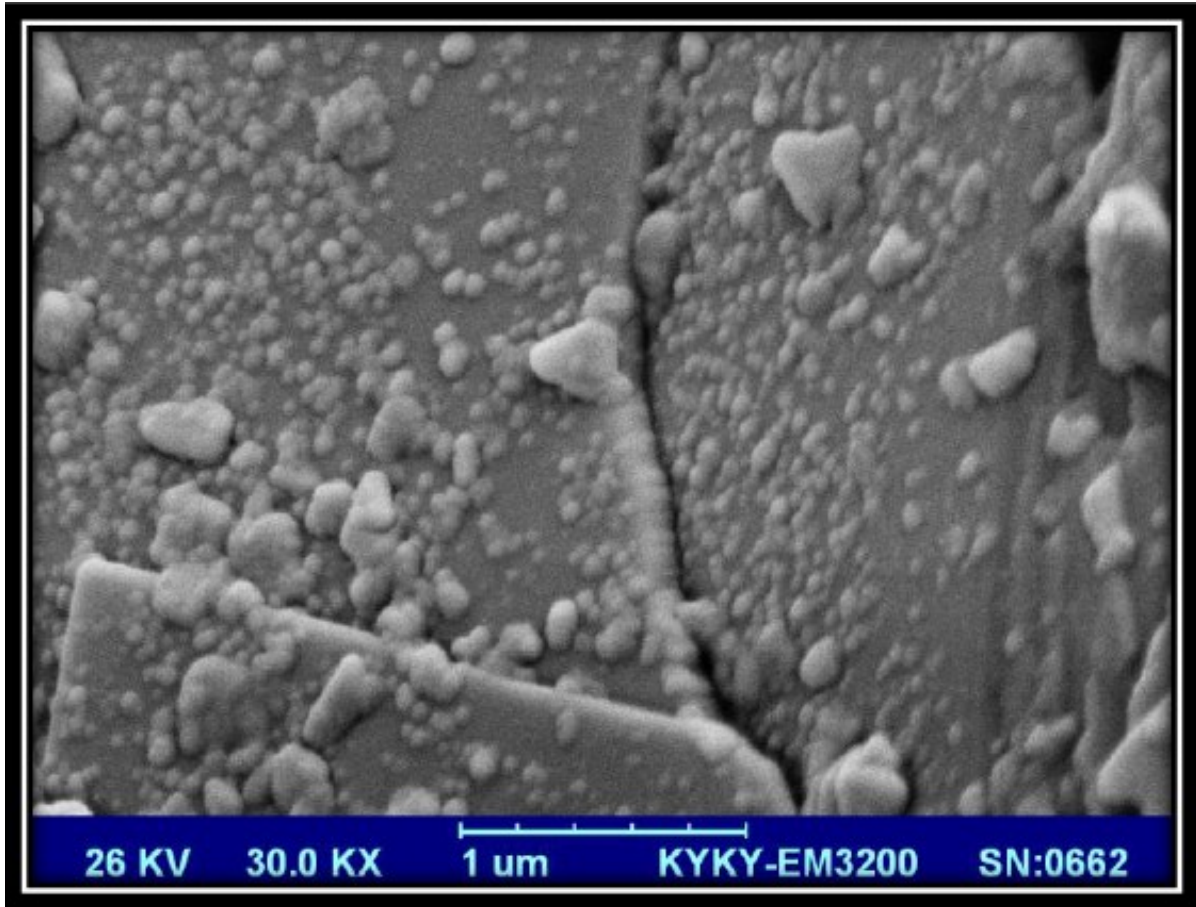

Fig. S1c

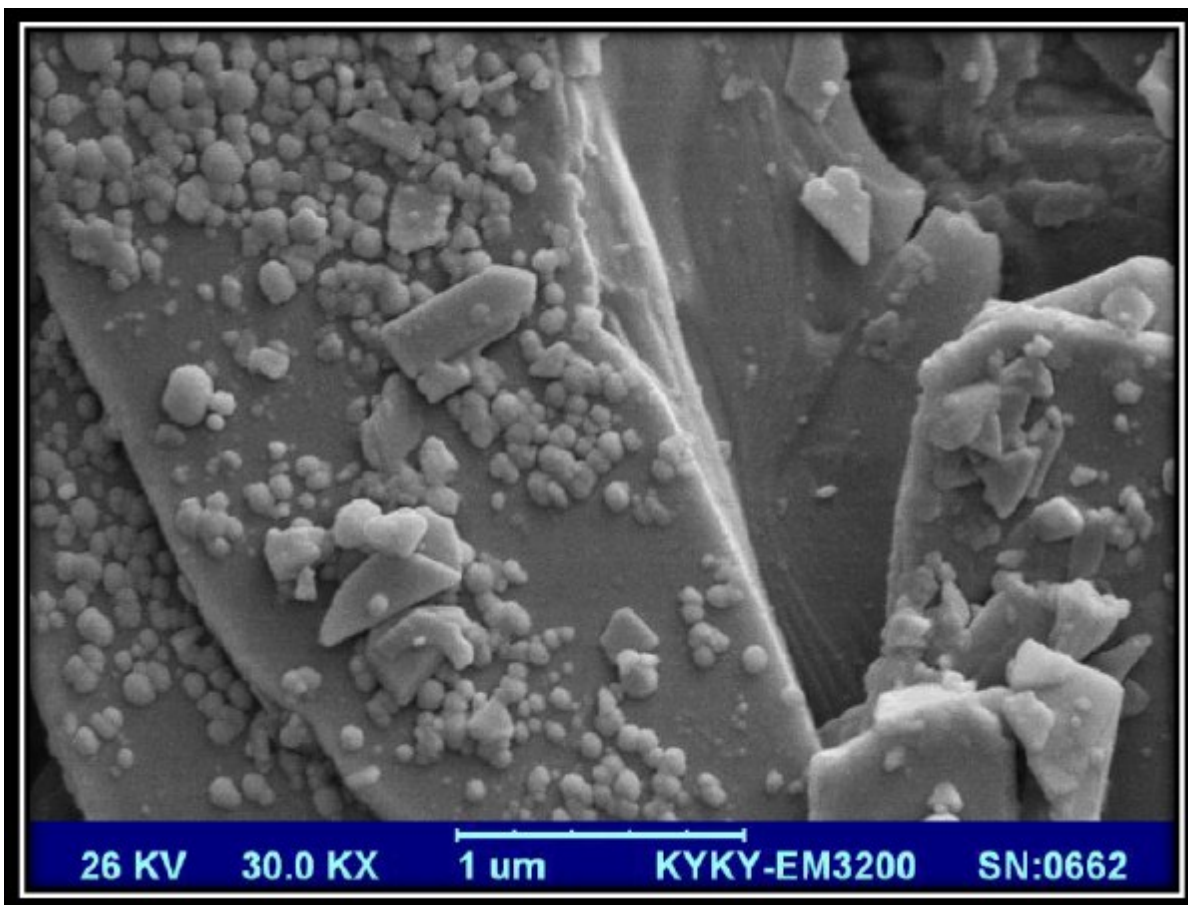

Fig. S1d

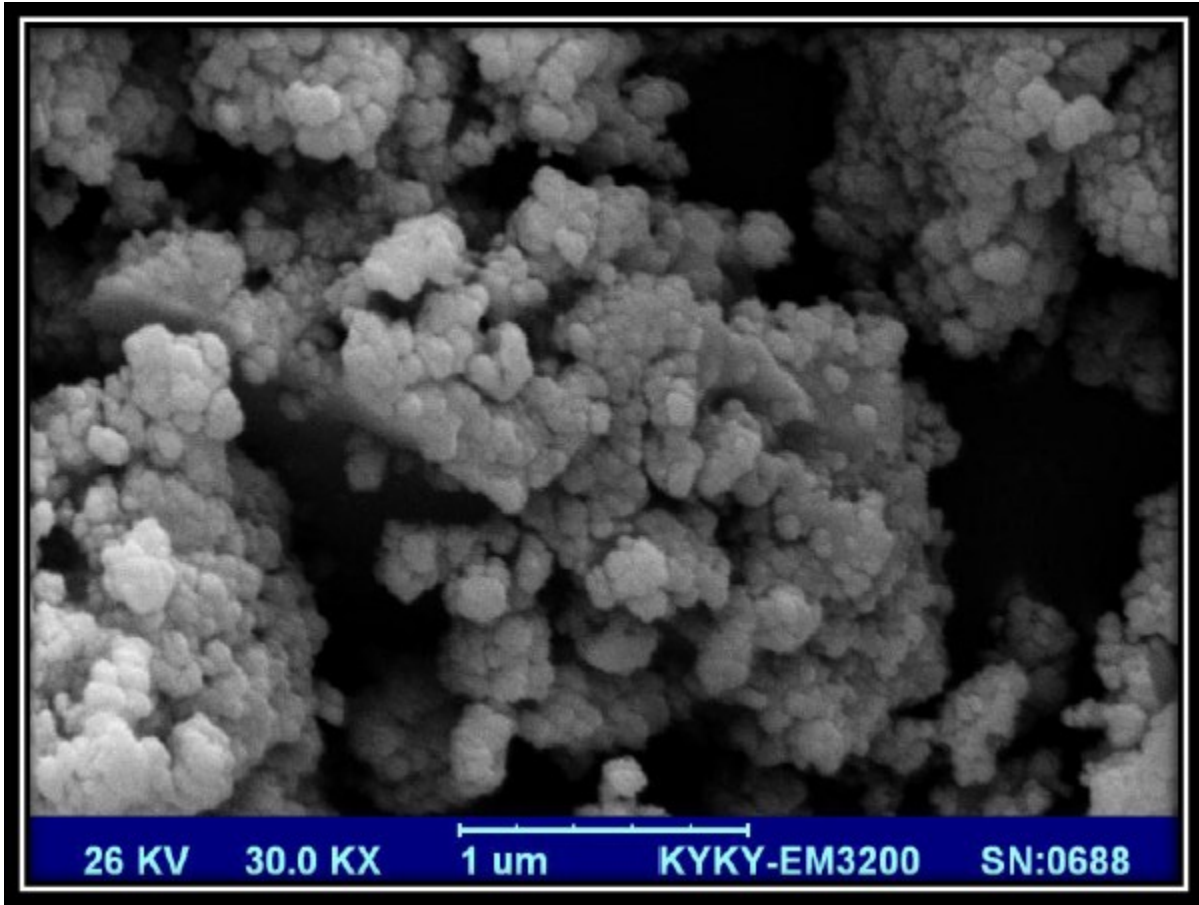

Fig. S1e
